# Supplementary material for: Intracellular Retention of ABL Kinase Inhibitors Determines Commitment to Apoptosis in CML Cells
Source: PubMed Central journal article supplement (PMC3397954; doi:10.1371/journal.pone.0040853), 2012-07-16
Supplement: pone.0040853.s006.pdf [file pone.0040853.s006.pdf]

Figure S6

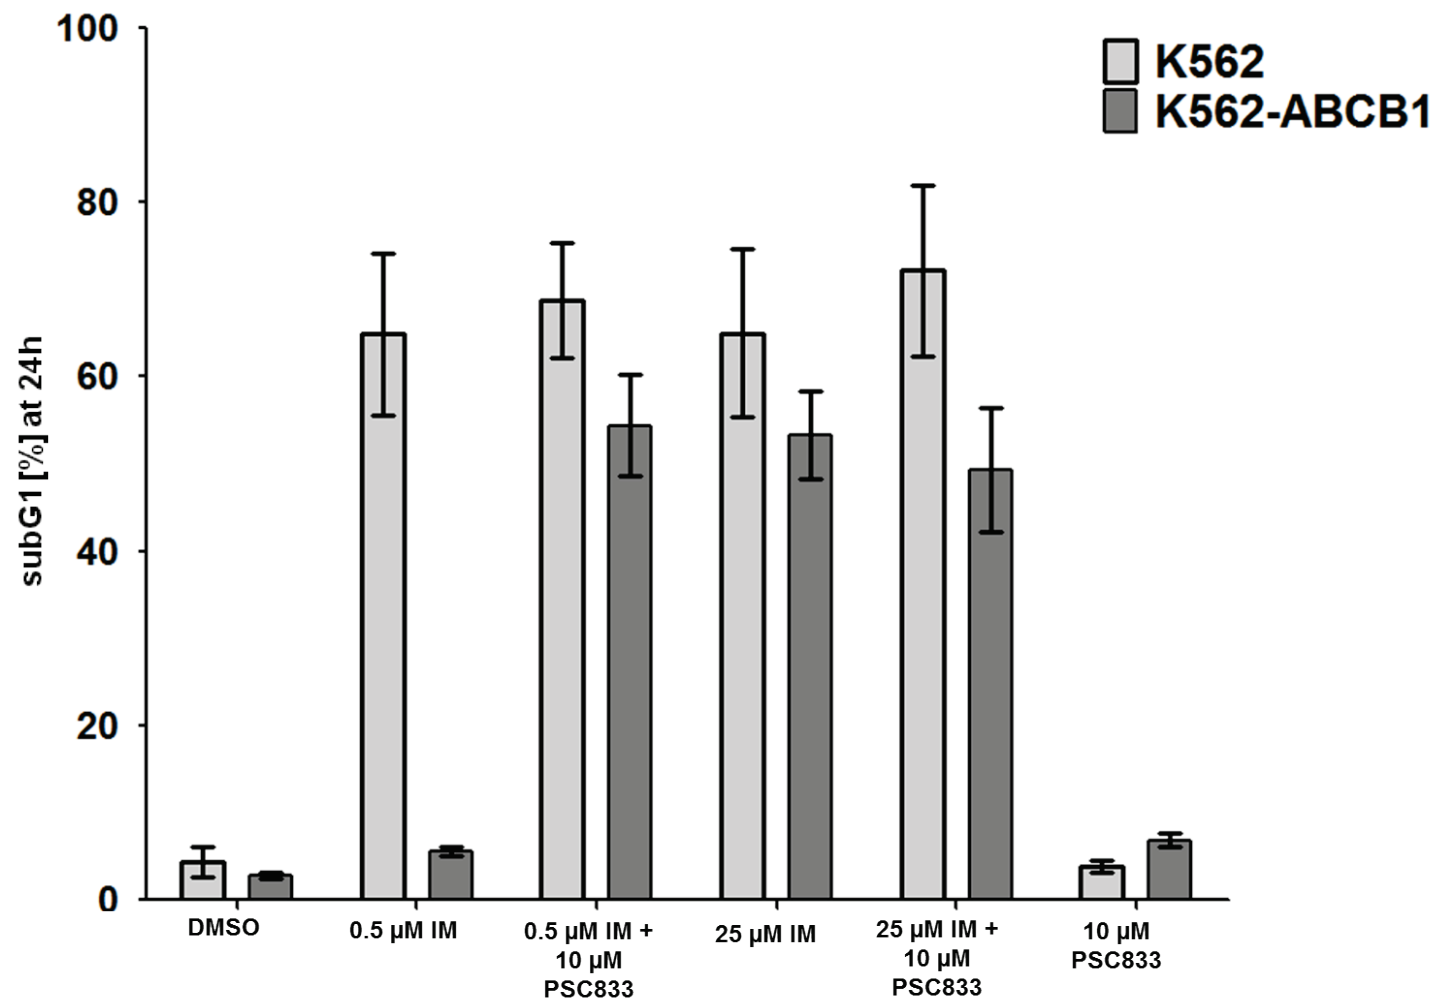

**Figure S6: ABCB1 expression confers imatinib resistance in K562 cells**

K562 and K562-ABCB1 cells were treated continuously either with 0.5 $\mu$ M or 25 $\mu$ M imatinib in the presence or absence of 10 $\mu$ M PSC833 as indicated. Cells exposed to 0.35% DMSO or 10 $\mu$ M PSC833 alone served as a control. Samples were analyzed after 24h by flow cytometry after propidium iodide staining. Three independent experiments were performed and results are shown as means  $\pm$  SEM.
