# Supplementary material for: Intracellular Retention of ABL Kinase Inhibitors Determines Commitment to Apoptosis in CML Cells
Source: PLOS journal article supplement (doi:10.1371/journal.pone.0040853), 2012-07-16
Supplement: S7 (10.1371/journal.pone.0040853.s007) [file journal.pone.0040853.s007]

**Table S1**

**(A)**

|                                                 | <b>C<sub>imatinib</sub> [μM]</b><br><b>Ba/F3-BCR-ABL</b> | <b>C<sub>imatinib</sub> [μM]</b><br><b>K562</b> | <b>C<sub>dasatinib</sub> [μM]</b><br><b>K562</b> |
|-------------------------------------------------|----------------------------------------------------------|-------------------------------------------------|--------------------------------------------------|
| <b>Lysate (diluted)</b>                         | <b>0.52 (±0.09)</b>                                      | <b>0.81 (±0.23)</b>                             | <b>0.000583 (±0.00004)</b>                       |
| <b>Intracellular concentration (calculated)</b> | <b>10994</b>                                             | <b>6513</b>                                     | <b>4.688</b>                                     |

**(B)**

|                      | <b>Diameter [μM]</b> | <b>Calculated volume/cell [L]</b> |
|----------------------|----------------------|-----------------------------------|
| <b>Ba/F3-BCR-ABL</b> | <b>12.18 (±1.63)</b> | <b>0.946 x 10<sup>-12</sup></b>   |
| <b>K562</b>          | <b>16.81 (±1.93)</b> | <b>2.487 x 10<sup>-12</sup></b>   |

**Table S1: TKI concentrations measured by HPLC / LC-MS/MS in cellular lysates**

**(A)** TKI concentrations  $\pm$ SEM measured by HPLC / LC-MS/MS in cellular lysates treated with 25 $\mu$ M imatinib or 100nM dasatinib for 2h as indicated followed by drug wash-out. Intracellular TKI concentrations were calculated based on the mean cellular volume.

**(B)** Mean size in  $\mu$ m  $\pm$ SD of Ba/F3-BCR-ABL cells and K562 cells. In total, 100 cells of each cell line were measured. Intracellular imatinib concentration was calculated based on the assumption that cells are spherical ( $V = 4/3 \times \pi \times r^3$ ). Thus, the total cellular volume for  $0.2 \times 10^6$  cells is 0.19 $\mu$ l for Ba/F3-BCR-ABL cells and 0.5 $\mu$ l for K562 cells.
